# Supplementary material
Source: publisher figshare collection journal article supplement (https://tandf.figshare.com/articles/dataset/_/3084175)
Supplement: Supplementary file 1 [file 1]

The femoral ontogeny and long bone histology of the Middle Triassic (?late Anisian)  
dinosauriform *Asilisaurus kongwe* and implications for the growth of early dinosaurs

C.T. GRIFFIN\* and STERLING J. NESBITT

Department of Geosciences, Virginia Polytechnic and State University, 4044 Derring Hall, 1405

Perry Street, Blacksburg, Virginia 24061, USA, ctgriff@vt.edu, sjn2104@vt.edu.

Journal of Vertebrate Paleontology

\*Corresponding author

TABLE S1. Measured widths of femoral heads compared with measured and estimated femoral lengths of each specimen. 95% confidence interval values given for estimated length as lower and upper ranges. Thin-sectioned specimens indicated by asterisk (\*).

| Specimen      | Maximum width of femoral head (mm) | Measured length (mm) | Estimated length (mm) | Lower range of confidence interval (mm) | Upper range of confidence interval (mm) |
|---------------|------------------------------------|----------------------|-----------------------|-----------------------------------------|-----------------------------------------|
| NMT RB169     | 14.56                              | 73.82                | ---                   | ---                                     | ---                                     |
| NMT RB221     | 15.66                              | ---                  | 82.69                 | 68.91                                   | 96.49                                   |
| NMT RB220     | 18.51                              | ---                  | 96.08                 | 85.15                                   | 107.0                                   |
| NMT RB172     | 17.66                              | 96.37                | ---                   | ---                                     | ---                                     |
| NMT RB185     | 18.73                              | ---                  | 97.11                 | 86.38                                   | 107.8                                   |
| NMT RB109     | 19.32                              | ---                  | 99.88                 | 89.63                                   | 110.1                                   |
| NMT RB19      | 19.38                              | ---                  | 100.2                 | 89.96                                   | 110.4                                   |
| NMT RB229     | 19.42                              | ---                  | 100.4                 | 90.18                                   | 110.5                                   |
| NMT RB223     | 19.48                              | ---                  | 100.6                 | 90.51                                   | 110.8                                   |
| NMT RB219     | 20.25                              | ---                  | 104.3                 | 94.67                                   | 113.8                                   |
| NMT RB228     | 20.98                              | ---                  | 107.7                 | 98.52                                   | 116.8                                   |
| NMT RB211*    | 21.19                              | ---                  | 108.7                 | 99.61                                   | 117.7                                   |
| NMT RB218     | 21.41                              | ---                  | 109.7                 | 100.7                                   | 118.6                                   |
| NMT RB112     | 21.92                              | ---                  | 112.1                 | 103.3                                   | 120.8                                   |
| NMT RB212*    | 22.28                              | ---                  | 113.8                 | 105.1                                   | 122.4                                   |
| NMT RB222     | 22.65                              | ---                  | 115.5                 | 107.0                                   | 124.1                                   |
| NMT RB102     | 23.34                              | ---                  | 118.8                 | 110.3                                   | 127.2                                   |
| NMT RB217     | 23.73                              | ---                  | 120.6                 | 112.1                                   | 129.1                                   |
| NMT RB215     | 23.74                              | ---                  | 120.6                 | 112.1                                   | 129.1                                   |
| NMT RB216     | 23.76                              | ---                  | 120.7                 | 112.1                                   | 129.1                                   |
| NMT RB213*    | 23.98                              | ---                  | 121.8                 | 113.2                                   | 130.3                                   |
| NMT RB179     | 26.01                              | ---                  | 131.3                 | 122.1                                   | 140.5                                   |
| NMT RB171     | 28.78                              | 137.15               | ---                   | ---                                     | ---                                     |
| NMT RB159 [R] | 27.81                              | 144.01               | ---                   | ---                                     | ---                                     |
| NMT RB159 [L] | 28.31                              | 144.38               | ---                   | ---                                     | ---                                     |
| NMT RB226*    | 31.41                              | ---                  | 156.6                 | 142.6                                   | 170.7                                   |
| SAM-PK-10598  | 35.79                              | ---                  | 177.2                 | 158.0                                   | 196.5                                   |

TABLE S2. The order of character development in each sequence predicted by ontogenetic sequence analysis (OSA) in *Asilisaurus kongwe*, and the specimen frequency weight of each sequence. Sequence 1 is the modal sequence. Character numbers follow Table 1.

| Sequence | Event 1 | Event 2 | Event 3 | Event 4   | Event 5 | Event 6 | Event 7 | Event 8 | Event 9 | Event 10 | Event 11 | Total Frequency Weight |
|----------|---------|---------|---------|-----------|---------|---------|---------|---------|---------|----------|----------|------------------------|
| 1        | 7       | 9       | 10      | 3         | 5,6     | 4       | 2       | 1       | 8       | 11       | ---      | 11.67                  |
| 2        | 7       | 9       | 10      | 3         | 5,6     | 4       | 2       | 1       | 11      | 8        | ---      | 11.33                  |
| 3        | 7       | 9       | 10      | 3         | 5,6     | 2       | 4       | 1       | 8       | 11       | ---      | 10.67                  |
| 4        | 7       | 9       | 10      | 3         | 5,6     | 2       | 4       | 1       | 11      | 8        | ---      | 10.33                  |
| 5        | 7       | 9       | 10      | 3         | 5,6     | 2       | 11      | 1       | 4       | 8        | ---      | 10.53                  |
| 6        | 7       | 9       | 10      | 3         | 5,6     | 2       | 11      | 1       | 8       | 4        | ---      | 8.73                   |
| 7        | 7       | 9       | 10      | 3         | 5,6     | 2       | 11      | 8       | 1       | 4        | ---      | 6.53                   |
| 8        | 7       | 9       | 5,6     | 3,10      | 4       | 2       | 1       | 8       | 11      | ---      | ---      | 10.00                  |
| 9        | 7       | 9       | 5,6     | 3,10      | 4       | 2       | 1       | 11      | 8       | ---      | ---      | 9.67                   |
| 10       | 7       | 9       | 5,6     | 3,10      | 2       | 4       | 1       | 8       | 11      | ---      | ---      | 9.00                   |
| 11       | 7       | 9       | 5,6     | 3,10      | 2       | 4       | 1       | 11      | 8       | ---      | ---      | 8.67                   |
| 12       | 7       | 9       | 5,6     | 3,10      | 2       | 11      | 1       | 4       | 8       | ---      | ---      | 8.87                   |
| 13       | 7       | 9       | 5,6     | 3,10      | 2       | 11      | 1       | 8       | 4       | ---      | ---      | 7.67                   |
| 14       | 7       | 9       | 5,6     | 3,10      | 2       | 11      | 8       | 1       | 4       | ---      | ---      | 6.67                   |
| 15       | 7       | 9       | 5,6     | 1         | 4       | 2       | 3       | 10      | 8       | 11       | ---      | 10.20                  |
| 16       | 7       | 9       | 5,6     | 1         | 2       | 4       | 3       | 10      | 8       | 11       | ---      | 10.53                  |
| 17       | 7       | 9       | 5,6     | 1         | 4       | 2       | 3       | 8       | 10      | 11       | ---      | 9.90                   |
| 18       | 7       | 9       | 5,6     | 1         | 2       | 4       | 3       | 8       | 10      | 11       | ---      | 10.23                  |
| 19       | 7       | 2,6     | 1,5     | 9         | 4       | 3       | 10      | 8       | 11      | ---      | ---      | 9.57                   |
| 20       | 7       | 2,6     | 1,5     | 9         | 4       | 3       | 8       | 10      | 11      | ---      | ---      | 9.90                   |
| 21       | 7       | 2,6     | 8       | 3,4,10,11 | 5,9     | 1       | 4       | ---     | ---     | ---      | ---      | 4.53                   |
| 22       | 7       | 6       | 5,9     | 3,10      | 4       | 2       | 1       | 8       | 11      | ---      | ---      | 9.67                   |
| 23       | 7       | 6       | 5,9     | 3,10      | 4       | 2       | 1       | 11      | 8       | ---      | ---      | 9.33                   |
| 24       | 7       | 6       | 5,9     | 3,10      | 2       | 4       | 1       | 8       | 11      | ---      | ---      | 8.67                   |
| 25       | 7       | 6       | 5,9     | 3,10      | 2       | 4       | 1       | 11      | 8       | ---      | ---      | 8.33                   |

|    |   |   |     |           |     |    |   |     |     |     |     |       |
|----|---|---|-----|-----------|-----|----|---|-----|-----|-----|-----|-------|
| 26 | 7 | 6 | 5,9 | 3,10      | 2   | 11 | 1 | 4   | 8   | --- | --- | 8.53  |
| 27 | 7 | 6 | 5,9 | 3,10      | 2   | 11 | 1 | 8   | 4   | --- | --- | 6.73  |
| 28 | 7 | 6 | 5,9 | 3,10      | 2   | 11 | 8 | 1   | 4   | --- | --- | 4.53  |
| 29 | 7 | 6 | 5,9 | 1         | 4   | 2  | 3 | 10  | 8   | 11  | --- | 9.87  |
| 30 | 7 | 6 | 5,9 | 1         | 4   | 2  | 3 | 8   | 10  | 11  | --- | 10.20 |
| 31 | 7 | 6 | 5,9 | 1         | 2   | 4  | 3 | 10  | 8   | 11  | --- | 9.57  |
| 32 | 7 | 6 | 5,9 | 1         | 2   | 4  | 3 | 8   | 10  | 11  | --- | 9.90  |
| 33 | 7 | 6 | 8,2 | 3,4,10,11 | 5,9 | 1  | 4 | --- | --- | --- | --- | 4.53  |

---

TABLE S3 The developmental sequence position of each character for each sequence predicted by ontogenetic sequence analysis (OSA), with mean sequence position and event standard deviation for each character. Character abbreviations follow Figs. 2, 3.

| Sequen<br>ce | <b>dltp</b><br><b>(1)</b> | <b>cfb</b><br><b>(2)</b> | <b>dlp</b><br><b>(3)</b> | <b>als</b><br><b>(4)</b> | <b>dlta</b><br><b>(5)</b> | <b>ts</b><br><b>(6)</b> | <b>at</b><br><b>(7)</b> | <b>ts+at</b><br><b>(8)</b> | <b>lia</b><br><b>(9)</b> | <b>lip</b><br><b>(10)</b> | <b>4th</b><br><b>(11)</b> |
|--------------|---------------------------|--------------------------|--------------------------|--------------------------|---------------------------|-------------------------|-------------------------|----------------------------|--------------------------|---------------------------|---------------------------|
| 1            | 8                         | 7                        | 4                        | 6                        | 5                         | 5                       | 1                       | 9                          | 2                        | 3                         | 10                        |
| 2            | 8                         | 7                        | 4                        | 6                        | 5                         | 5                       | 1                       | 10                         | 2                        | 3                         | 9                         |
| 3            | 8                         | 6                        | 4                        | 7                        | 5                         | 5                       | 1                       | 9                          | 2                        | 3                         | 10                        |
| 4            | 8                         | 6                        | 4                        | 7                        | 5                         | 5                       | 1                       | 10                         | 2                        | 3                         | 9                         |
| 5            | 8                         | 6                        | 4                        | 9                        | 5                         | 5                       | 1                       | 10                         | 2                        | 3                         | 7                         |
| 6            | 8                         | 6                        | 4                        | 10                       | 5                         | 5                       | 1                       | 9                          | 2                        | 3                         | 7                         |
| 7            | 9                         | 6                        | 4                        | 10                       | 5                         | 5                       | 1                       | 8                          | 2                        | 3                         | 7                         |
| 8            | 7                         | 6                        | 4                        | 5                        | 3                         | 3                       | 1                       | 8                          | 2                        | 4                         | 9                         |
| 9            | 7                         | 6                        | 4                        | 5                        | 3                         | 3                       | 1                       | 9                          | 2                        | 4                         | 8                         |
| 10           | 7                         | 5                        | 4                        | 6                        | 3                         | 3                       | 1                       | 8                          | 2                        | 4                         | 9                         |
| 11           | 7                         | 5                        | 4                        | 6                        | 3                         | 3                       | 1                       | 9                          | 2                        | 4                         | 8                         |
| 12           | 7                         | 5                        | 4                        | 8                        | 3                         | 3                       | 1                       | 9                          | 2                        | 4                         | 6                         |
| 13           | 7                         | 5                        | 4                        | 9                        | 3                         | 3                       | 1                       | 8                          | 2                        | 4                         | 6                         |
| 14           | 8                         | 5                        | 4                        | 9                        | 3                         | 3                       | 1                       | 7                          | 2                        | 4                         | 6                         |
| 15           | 4                         | 6                        | 7                        | 5                        | 3                         | 3                       | 1                       | 9                          | 2                        | 7                         | 10                        |
| 16           | 4                         | 5                        | 7                        | 6                        | 3                         | 3                       | 1                       | 9                          | 2                        | 7                         | 10                        |
| 17           | 4                         | 6                        | 7                        | 5                        | 3                         | 3                       | 1                       | 8                          | 2                        | 7                         | 10                        |
| 18           | 4                         | 5                        | 7                        | 6                        | 3                         | 3                       | 1                       | 8                          | 2                        | 7                         | 10                        |
| 19           | 3                         | 2                        | 6                        | 5                        | 3                         | 2                       | 1                       | 8                          | 4                        | 6                         | 9                         |
| 20           | 3                         | 2                        | 6                        | 5                        | 3                         | 2                       | 1                       | 7                          | 4                        | 6                         | 9                         |
| 21           | 6                         | 2                        | 4                        | 4                        | 5                         | 2                       | 1                       | 3                          | 5                        | 4                         | 4                         |
| 22           | 7                         | 6                        | 4                        | 5                        | 3                         | 2                       | 1                       | 8                          | 3                        | 4                         | 9                         |
| 23           | 7                         | 6                        | 4                        | 5                        | 3                         | 2                       | 1                       | 9                          | 3                        | 4                         | 8                         |
| 24           | 7                         | 5                        | 4                        | 6                        | 3                         | 2                       | 1                       | 8                          | 3                        | 4                         | 9                         |
| 25           | 7                         | 5                        | 4                        | 6                        | 3                         | 2                       | 1                       | 9                          | 3                        | 4                         | 8                         |
| 26           | 7                         | 5                        | 4                        | 8                        | 3                         | 2                       | 1                       | 9                          | 3                        | 4                         | 6                         |
| 27           | 7                         | 5                        | 4                        | 9                        | 3                         | 2                       | 1                       | 8                          | 3                        | 4                         | 6                         |
| 28           | 8                         | 5                        | 4                        | 9                        | 3                         | 2                       | 1                       | 7                          | 3                        | 4                         | 6                         |
| 29           | 4                         | 6                        | 7                        | 5                        | 3                         | 2                       | 1                       | 9                          | 3                        | 7                         | 10                        |
| 30           | 4                         | 6                        | 7                        | 5                        | 3                         | 2                       | 1                       | 8                          | 3                        | 7                         | 10                        |
| 31           | 4                         | 5                        | 7                        | 6                        | 3                         | 2                       | 1                       | 9                          | 3                        | 7                         | 10                        |
| 32           | 4                         | 5                        | 7                        | 6                        | 3                         | 2                       | 1                       | 8                          | 3                        | 7                         | 10                        |
| 33           | 6                         | 3                        | 4                        | 7                        | 5                         | 2                       | 1                       | 3                          | 5                        | 4                         | 4                         |
| Mean         | 6.3                       | 5.2                      | 4.9                      | 6.5                      | 3.5                       | 3.0                     | 1                       | 8.2                        | 2.6                      | 4.6                       | 8.2                       |
| SD           | 1.8                       | 1.3                      | 1.3                      | 1.7                      | 0.9                       | 1.2                     | 0                       | 1.6                        | 0.9                      | 1.5                       | 1.8                       |
